# Supplementary material for: Identification of functional transcription factor binding sites using closely related Saccharomyces species
Source: HighWire-hosted journal article supplement (doi:10.1101/gr.3578205), 2005-04-18
Supplement: Supplemental_Figure_2.pdf [file Supplemental_Figure_2.pdf]

Supplemental Figure 2

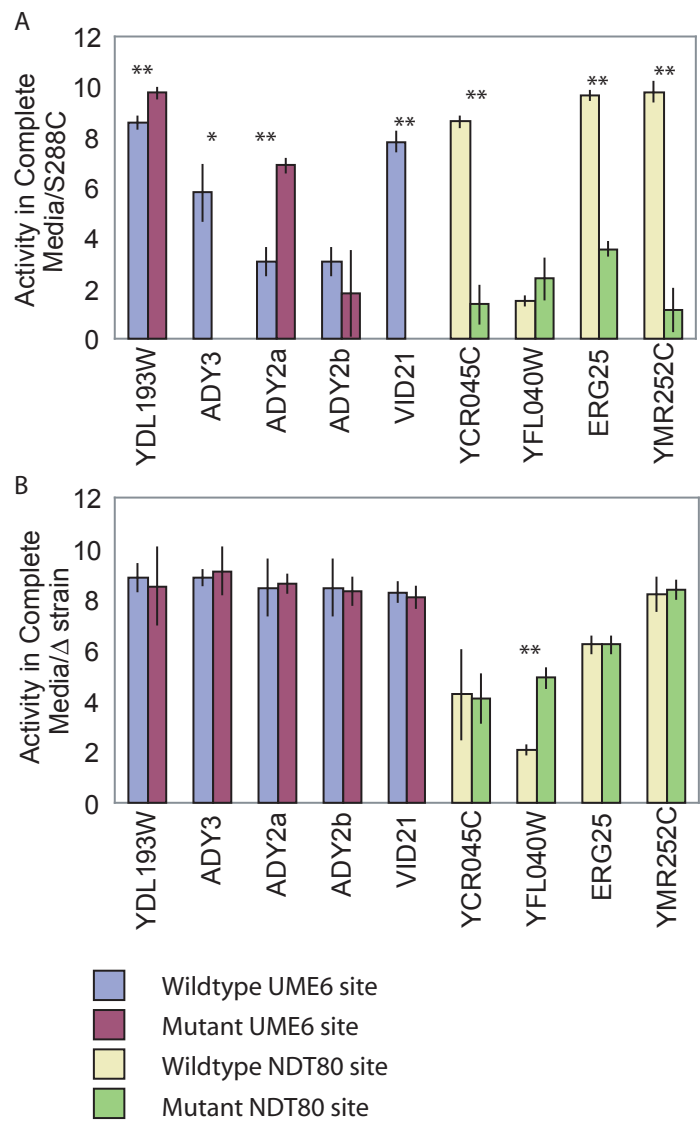

Figure S2. A. Expression levels from nine wildtype and mutant *S. cerevisiae* promoters. Data from 5 Ume6 sites are shown with wildtype expression in blue and mutant expression in red. Data from 4 Ndt80 sites are shown with wildtype in yellow, and mutant in green. (A) Expression levels of wildtype and mutant promoters in the S288C background after 8hrs in complete media. (B) Expression in a *ume6D* or *ndt80D* strain after 8hrs in complete media. The data displayed is the log2 of the mean b-gal expression intensity of 5 biological replicates. Significance was calculated using Student's t-test (\* =  $p < 0.05$ , \*\* =  $p < 0.01$ ).
