# Supplementary material for: Identification of functional transcription factor binding sites using closely related Saccharomyces species
Source: HighWire-hosted journal article supplement (doi:10.1101/gr.3578205), 2005-04-18
Supplement: Supplemental_Figure_3.pdf [file Supplemental_Figure_3.pdf]

### Supplemental Figure 3

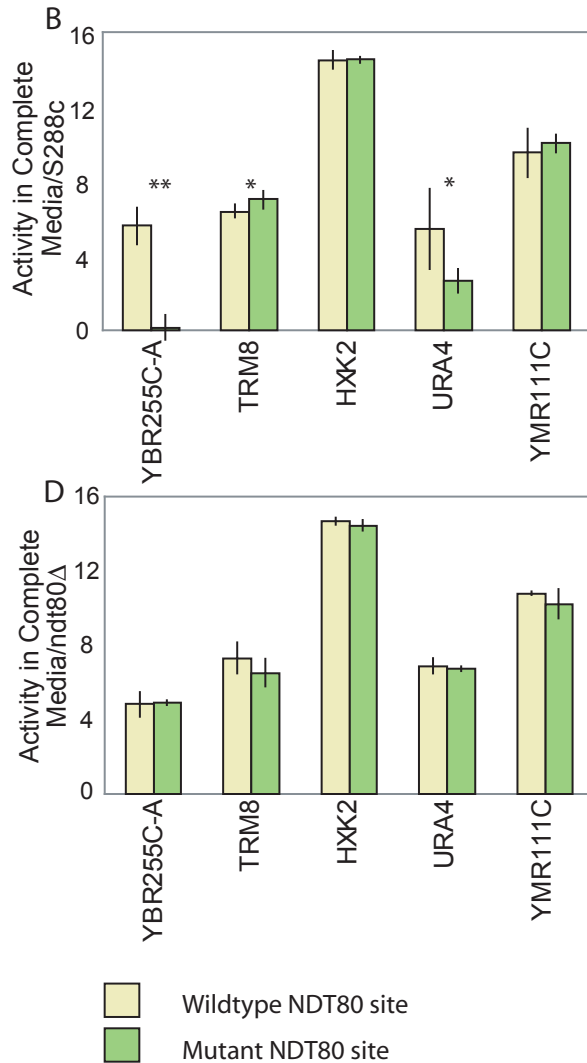

Figure S3. Expression levels from five unconserved Ndt80 sites that are present in *S. cerevisiae* promoters. Wildtype is shown in yellow, mutant in green. (A) Expression levels of wildtype and mutant promoters in the S288C background after 8hrs in complete media. (B) Expression from *ndt80D* strained after 8hrs in complete media. The data displayed is the log2 of the mean b-gal expression intensity of 5 biological replicates. Significance was calculated using Student's t-test (\* =  $p < 0.05$ , \*\* =  $p < 0.01$ ).
