# Supplementary material for: Identification of functional transcription factor binding sites using closely related Saccharomyces species
Source: HighWire-hosted journal article supplement (doi:10.1101/gr.3578205), 2005-04-18
Supplement: Supplemental_Figure_5.pdf [file Supplemental_Figure_5.pdf]

# Supplemental Figure 5

A

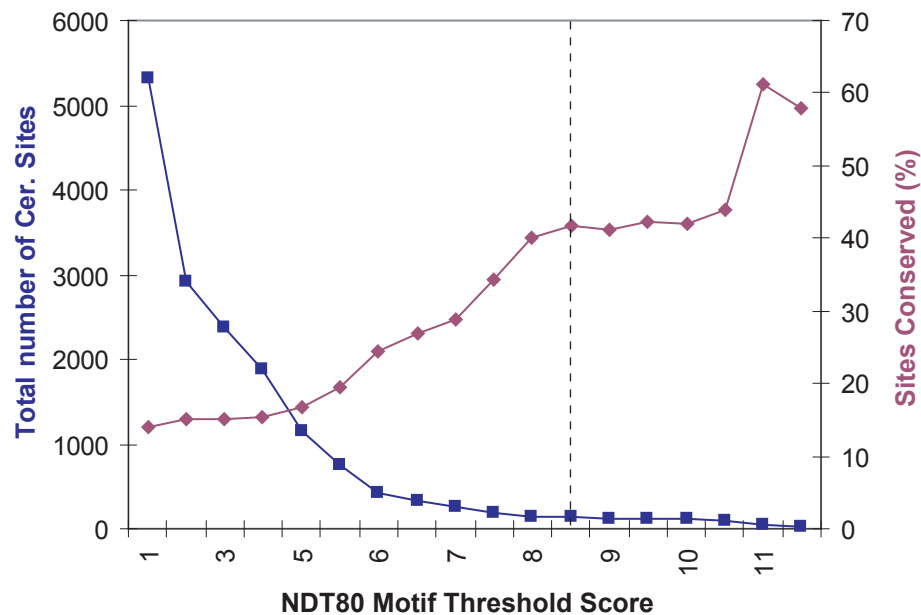

B

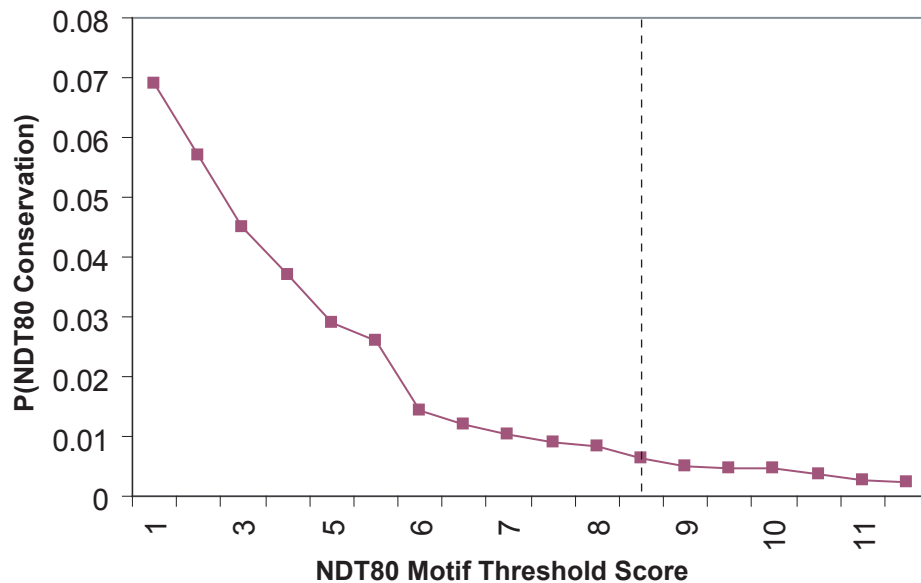

Figure S5. The motif score threshold affects both the number of sites and the probability of motif conservation. (A) The blue squares show the total number of NDT80 sites is shown as a function of cutoff score. The red diamonds show the percentage of conserved sites at each motif threshold. (B) The probability of observing a Ndt80 site conserved between the three genomes is shown as a function of the motif threshold. A threshold score of 8.7 was used for NDT80 in this analysis, shown by the dotted line.
